# Supplementary material
Source: PubMed Central journal article supplement (PMC1489914)
Supplement: plntphys_pp.106.076893_1.pdf [file plntphys_pp.106.076893_1.pdf]

**Supplemental Table I.** Summary of T-DNA lines screened<sup>§</sup>. Each gene encodes a putative FHA domain.

| Gene Number              | Line number        | Insertion location | Insertion details |
|--------------------------|--------------------|--------------------|-------------------|
| AT3g20550 ( <i>DDL</i> ) | WI BASTA (4,G,P3)  | 1112               | intron            |
|                          | WI ALPHA (P,3,G4)  | 25                 | Exon              |
| AT1g34355                | SYN_1164_C09       | 5051               | Exon              |
|                          | SYN_267B_H03       |                    |                   |
| AT1g60700                | WI BASTA (4,G,P66) | 687                | Exon              |
|                          | SYN_267_B05        |                    |                   |
|                          | SYN_597_D06        |                    |                   |
|                          | SYN_515_B11        | 831                | Exon              |
| AT1g75530                | SALK_033627        |                    |                   |
|                          | SYN_565_A02        | 2184               | Intron            |
|                          | SYN_1164_G12       | -167               | 5'                |
| AT3g02400                | SALK_013277        | -275               | 5'                |
|                          | SYN_451_A06        |                    |                   |
| AT3g07220                | SALK_095831        | 468                | intron            |
|                          | SYN_435_D05        | 1634               | 3'                |
|                          | SYN_196_C04        | 1621               | 3'                |
| AT3g07260                | SALK_007887        | 989                | exon              |
|                          | SYN_435_D05        |                    |                   |
|                          | SYN_39_D08         |                    |                   |
| AT4g14490                | SYN_196_C04        |                    |                   |
|                          | SYN_890_A01        |                    |                   |
|                          | SYN_158_C03        |                    |                   |
|                          | SALK_019005        |                    |                   |
| AT5g38840                | SALK_018997        | -89                | 5'                |
|                          | SYN_1236_B05       |                    |                   |
|                          | SYN_1283_D01       | 1350               | Intron            |
| AT5g47790                | WI BASTA (9,E,P68) | 2454               | Exon              |
|                          | SALK_054842        |                    |                   |
| AT5g67030                | SYN_310_D07        |                    |                   |
| AT5g67030                | SYN_310_B03        |                    |                   |
|                          | SYN_310_A04        | 562                | Intron            |
|                          | SALK_059469        | 2018               | Intron            |

<sup>§</sup> Submitted to Arabidopsis Biological Resource Center Stock Center.
